# Supplementary material
Source: PubMed Central journal article supplement (PMC8274816)
Supplement: NIHMS1720880-supplement-Supplementary_data.pdf [file NIHMS1720880-supplement-Supplementary_data.pdf]

---

**Supplementary information**

---

**Restoring metabolism of myeloid cells  
reverses cognitive decline in ageing**

---

In the format provided by the  
authors and unedited

## **Restoring metabolism of myeloid cells reverses cognitive decline in ageing**

Paras S. Minhas<sup>1,2,3</sup>, Amira Latif-Hernandez<sup>1,#</sup>, Melanie R. McReynolds<sup>4,5,#</sup>, Aarooran S. Durairaj<sup>1</sup>, Qian Wang<sup>1</sup>, Amanda Rubin<sup>1,2</sup>, Amit U. Joshi<sup>6</sup>, Joy Q. He<sup>7</sup>, Esha Gauba<sup>1</sup>, Ling Liu<sup>4,5</sup>, Congcong Wang<sup>1</sup>, Miles Linde<sup>8</sup>, Yuki Sugiura<sup>9</sup>, Peter K. Moon<sup>1</sup>, Ravi Majeti<sup>8</sup>, Makoto Suematsu<sup>9</sup>, Daria Mochly-Rosen<sup>6</sup>, Irving L. Weissman<sup>7</sup>, Frank M. Longo<sup>1</sup>, Joshua D. Rabinowitz<sup>4,5</sup>, Katrin I. Andreasson<sup>1,10,11</sup>

<sup>1</sup>Department of Neurology & Neurological Sciences, Stanford University School of Medicine, Stanford, CA

<sup>2</sup>Neurosciences Graduate Program, Stanford University, Stanford, CA

<sup>3</sup>Medical Scientist Training Program, Stanford University, Stanford, CA

<sup>4</sup>Department of Chemistry, Princeton University, Princeton, NJ

<sup>5</sup>Lewis-Sigler Institute for Integrative Genomics, Princeton University, Princeton, NJ

<sup>6</sup>Department of Chemical & Systems Biology, Stanford University, Stanford, CA

<sup>7</sup>Institute for Stem Cell Biology & Regenerative Medicine, Stanford University School of Medicine, CA

<sup>8</sup>Department of Hematology, Stanford University School of Medicine, Stanford, CA

<sup>9</sup>Department of Biochemistry, Keio University School of Medicine, Tokyo, Japan.

<sup>10</sup>Wu Tsai Neurosciences Institute, Stanford University, Stanford, CA

<sup>11</sup>Stanford Immunology Program, Stanford, CA

#These authors contributed equally

### **Supplementary Materials Guide:**

**Supplementary Figures 1a, 1b, 1c:** source immunoblots

**Supplementary Figure 2**

**Supplementary Figure 3**

### I. Raw gel for Fig. 2F

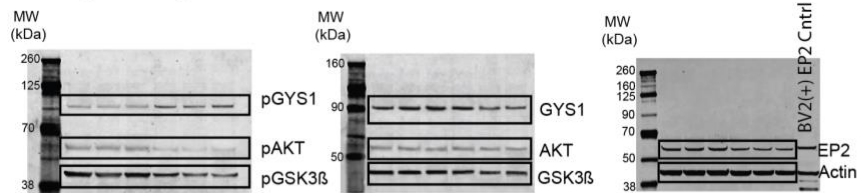

### II. Raw gel for Extended Fig. 1B

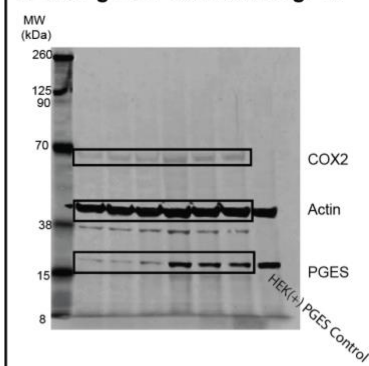

### III. Raw gel for Extended Fig. 1C

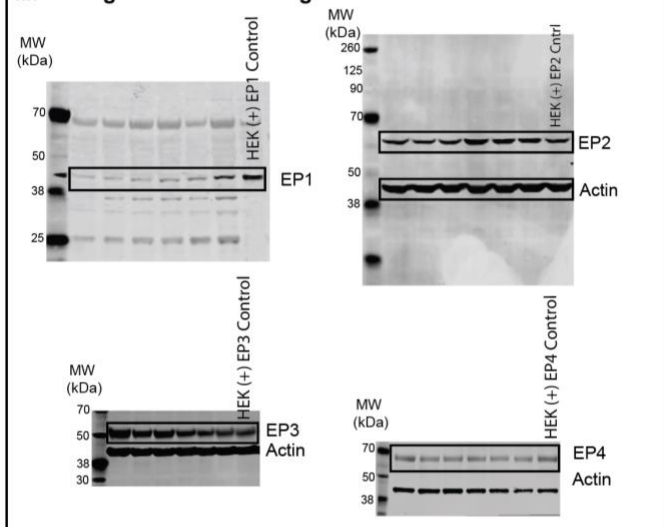

### IV. Raw gel for Extended Fig. 1K

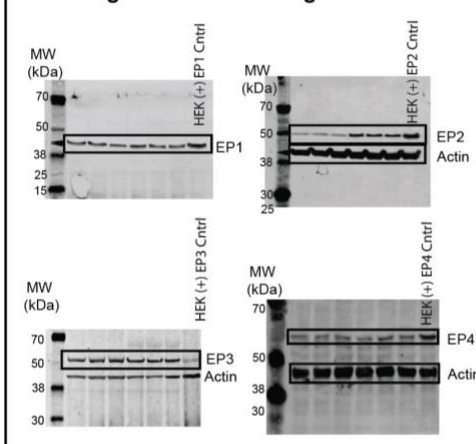

### V. Raw gel for Extended Fig. 2D

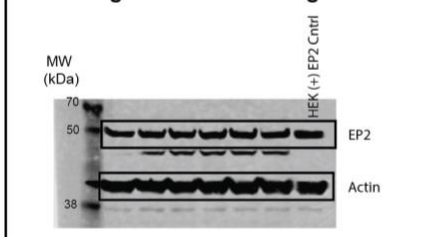

### VI. Raw gel for Extended Fig. 2K

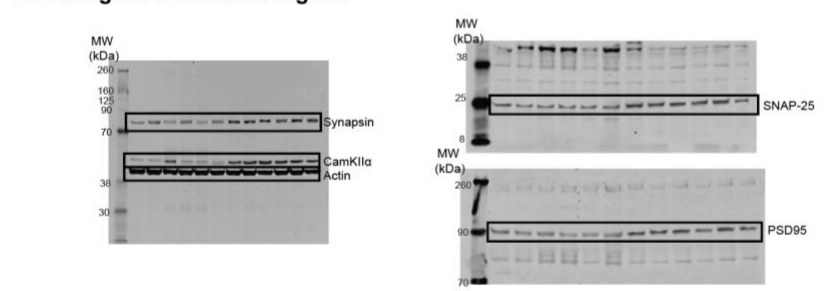

### VII. Raw gel for Extended Fig. 3A

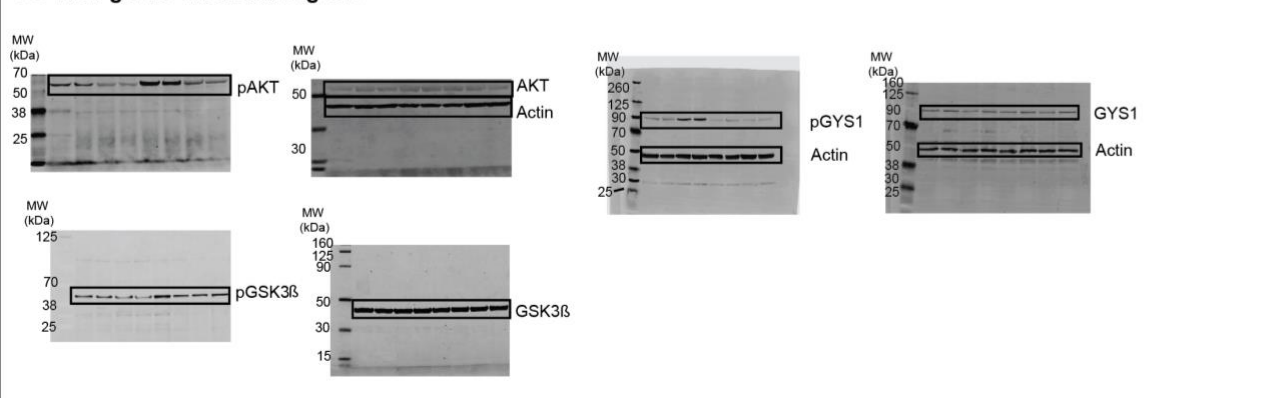

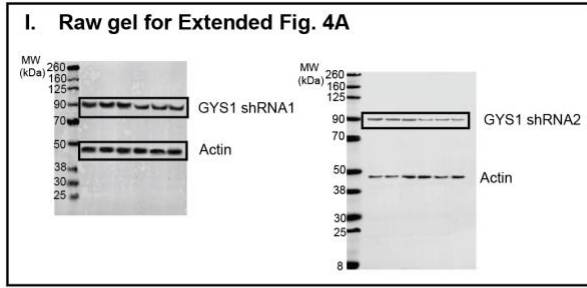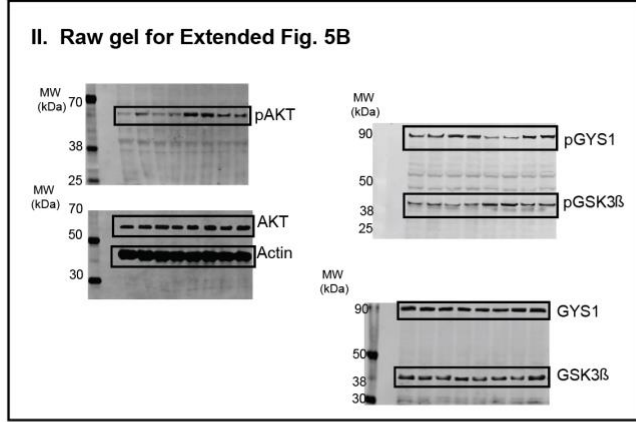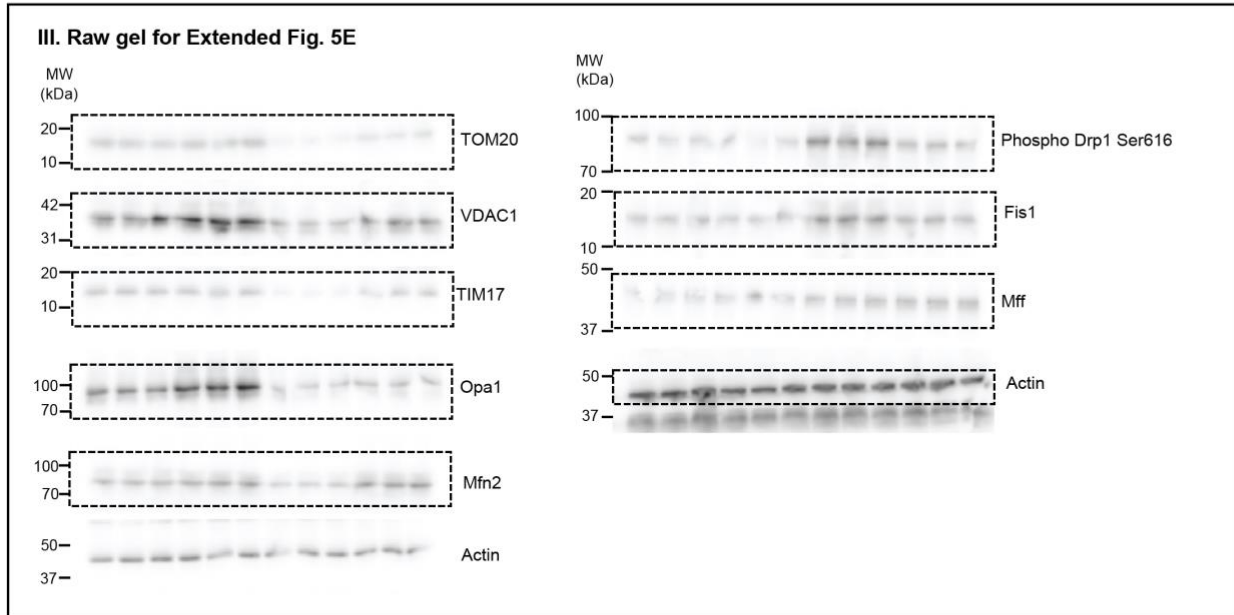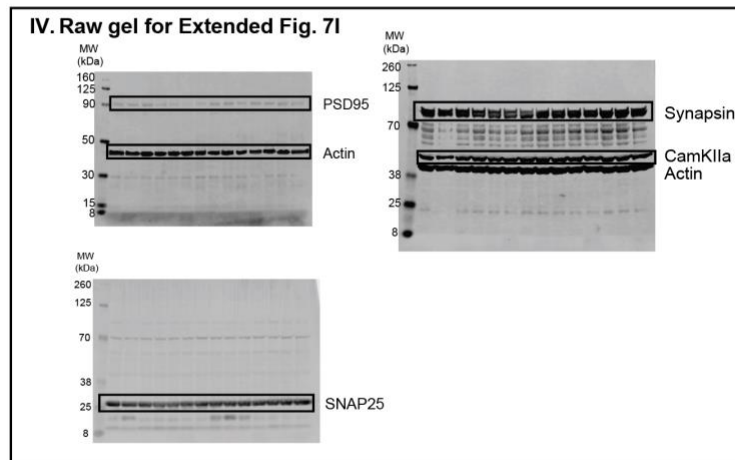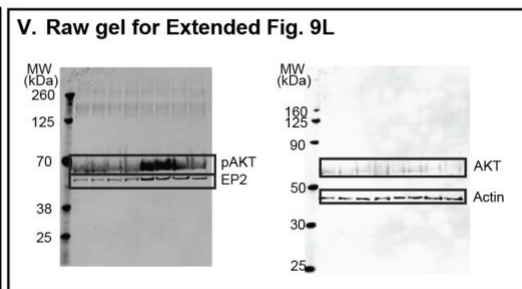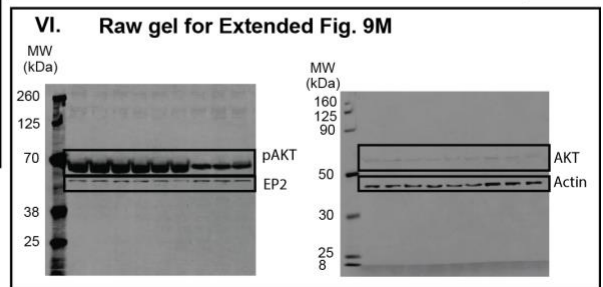

Supplementary Figure 1b

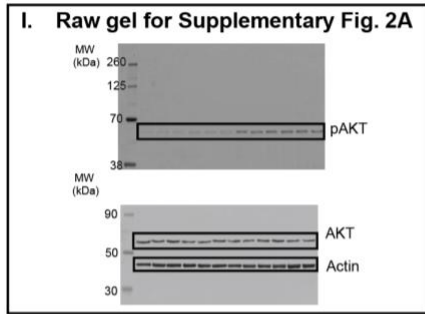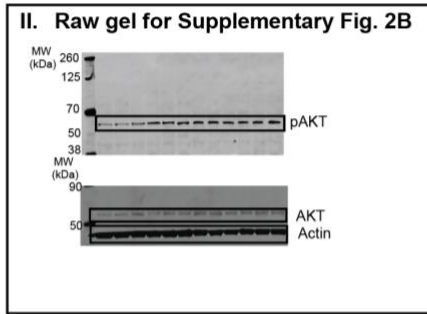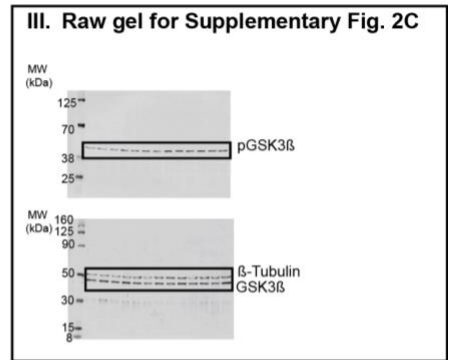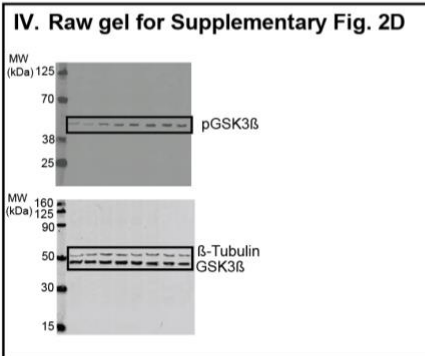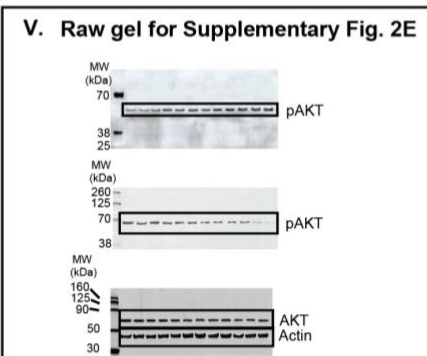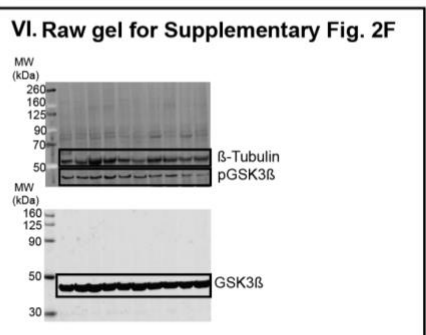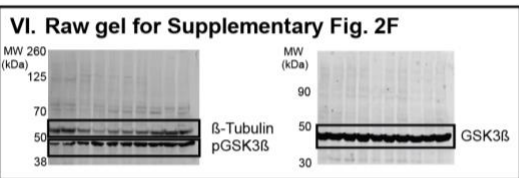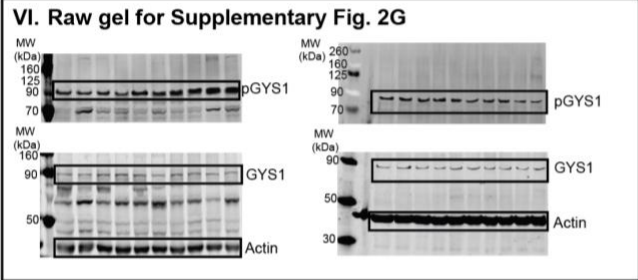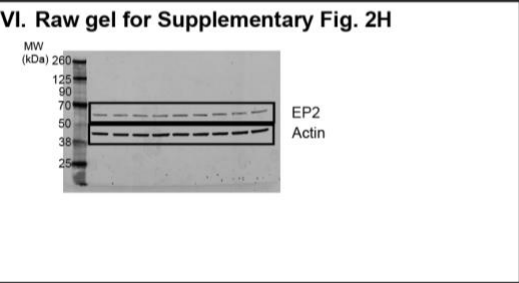

Supplementary Figure 1c

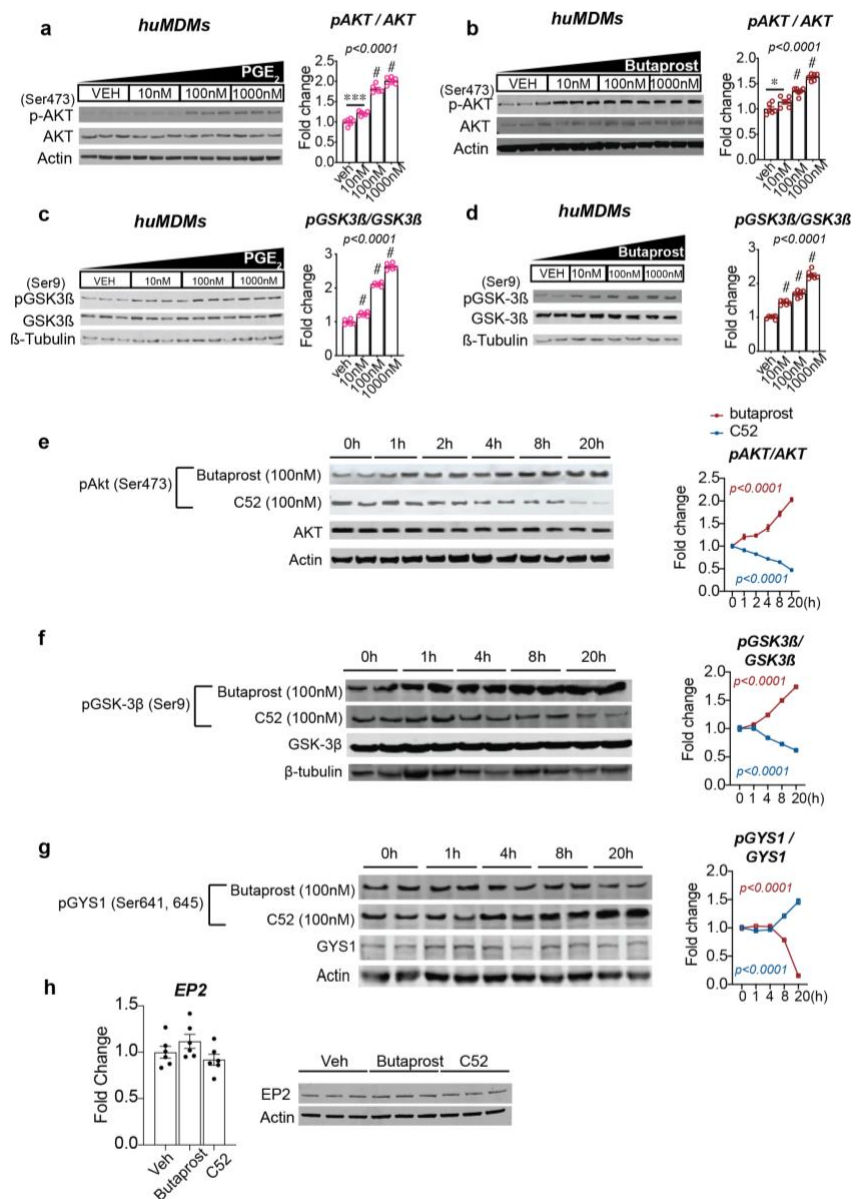

**Supplementary Figure 2. Effects of PGE<sub>2</sub>, the EP2 agonist butaprost, and EP2 inhibitor C52 in human MDMs.** Human MDMs are from n = 6 donors (age mean ± SE: 43 ± 8.344 years).

**a-b.** Representative immunoblots and quantification of two independent experiments measuring effects of ascending doses of PGE<sub>2</sub> (**a**) and the EP2 agonist butaprost (**b**) at 20 h on Ser473 pAKT /total AKT in human MDMs.  $P < 0.0001$  by 64-way ANOVA; Tukey's post-hoc test  $*P = 0.0340$ ,  $***P = 0.006$ ,  $\#P < 0.0001$ .

**c-d.** Representative immunoblots and quantification of two independent experiments measuring the effect of ascending doses of PGE<sub>2</sub> (**c**) and the EP2 agonist butaprost (**d**) at 20 h on Ser9 pGSK3β / total GSK3β in human MDMs.  $P < 0.0001$  by one-way ANOVA; Tukey's post-hoc test  $\#P < 0.0001$ .

**e-g.** Representative immunoblots and quantification of time course of pAKT (Ser473) /total AKT (**e**), pGSK3β (Ser9) / total GSK3β (**f**), and pGYS1 (Ser641, 645, 649) /total GYS1 (**g**) from six independent experiments in huMDMs treated with butaprost (100 nM, red) or C52 (100 nM, blue) from 0h to 20 h.  $P < 0.0001$  by one-way ANOVA.

**h.** Representative immunoblot and quantification of two independent experiments measuring effect of butaprost (20h, 100nM) and the C52 (20h, 100nM) on EP2 levels in human MDMs.

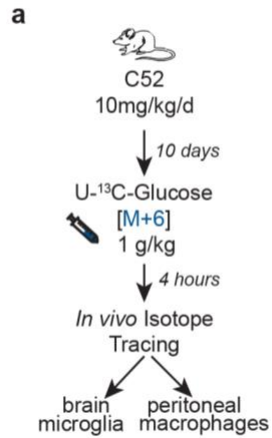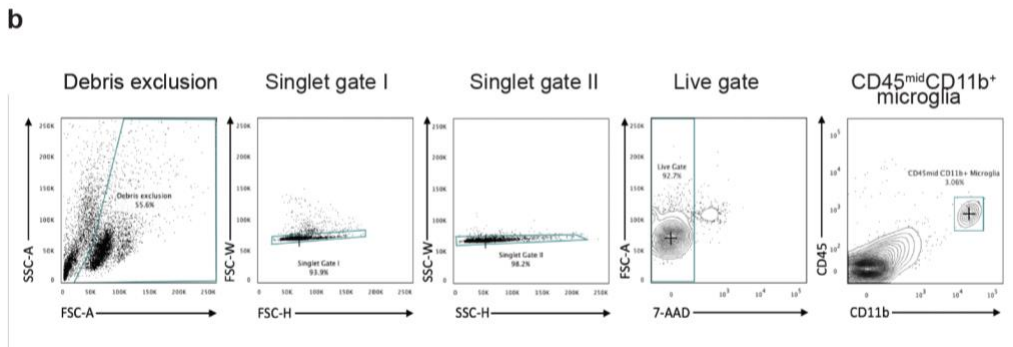

**Supplementary Figure 3. Experimental approach for microglial isotope labeling and gating strategy.**

**a.** Young and aged mice were administered C52 for 10 days at 10 mg/kg/day by oral gavage. On day 10, U-<sup>13</sup>C-Glucose (1g/kg by gavage) was administered for *in vivo* isotope tracing of brain microglia and peritoneal macrophages harvested 4 hours later.

**b.** Gating strategy for isolation of CD45<sup>mid</sup>CD11b<sup>+</sup> microglia from young (3-4 mo) and aged (22-24 mo) mice.
